# Supplementary material
Source: MDPI journal article supplement (https://www.mdpi.com/2075-163X/12/7/785)
Supplement: s1 [file s1]

**Table S1.** Trace element content of astrophyllite from the Boziguoer deposit.

| Num-<br>ber | BZ-Ast-<br>1 | BZ-Ast-<br>2 | BZ-Ast-<br>3 | BZ-Ast-<br>4 | BZ-Ast-<br>5 | BZ-Ast-<br>6 | BZ-Ast-<br>7 | BZ-Ast-<br>8 | BZ-Ast-<br>9 | BZ-Ast-<br>10 |
|-------------|--------------|--------------|--------------|--------------|--------------|--------------|--------------|--------------|--------------|---------------|
| Li          | 519          | 388          | 619          | 370          | 1611         | 1205         | 3068         | 96.7         | 2496         | 2594          |
| B           | 11.28        | 17.72        | 22.74        | 14.55        | 20.20        | 21.63        | 61.33        | 24.05        | 6848         | 1445          |
| Sc          | 1.82         | 1.69         | 2.16         | 2.27         | 1.44         | 1.54         | 2.53         | 1.25         | 1.96         | 2.10          |
| V           | 0.00         | 0.02         | 0.03         | 0.08         | 0.06         | 0.03         | 0.04         | 0.04         | 0.04         | 0.13          |
| Cr          | 7.96         | 9.96         | 2.31         | 8.09         | 8.55         | 5.54         | 5.64         | 19.33        | 2.49         | 6.21          |
| Co          | 0.46         | 0.54         | 0.41         | 0.17         | 2.05         | 1.87         | 1.69         | 0.54         | 0.38         | 0.48          |
| Ni          | 20.38        | 25.96        | 11.52        | 14.62        | 0.21         | 0.56         | 1.07         | 1.55         | 0.41         | 0.35          |
| Cu          | 3.61         | 3.22         | 0.99         | 2.03         | 1.37         | 3.74         | 4.82         | 3.97         | 7.52         | 23.69         |
| Zn          | 3615         | 4251         | 3883         | 3892         | 4187         | 4954         | 4483         | 5153         | 3216         | 3713          |
| Ga          | 15.51        | 13.57        | 12.37        | 12.86        | 9.02         | 20.86        | 21.07        | 16.22        | 1029         | 219           |
| Ge          | 7.21         | 7.78         | 6.28         | 6.64         | 6.48         | 10.64        | 13.50        | 8.37         | 237          | 131           |
| Rb          | 14339        | 14627        | 14504        | 15668        | 14222        | 14117        | 14005        | 13274        | 8551         | 10220         |
| Sr          | 3.59         | 6.91         | 4.53         | 4.33         | 7.79         | 13.11        | 8.84         | 5.66         | 51.11        | 76.25         |
| Y           | 6.49         | 7.23         | 6.61         | 5.01         | 4.82         | 5.47         | 19.08        | 36.96        | 1869         | 11077         |
| Zr          | 2430         | 1913         | 3137         | 2485         | 1487         | 1650         | 2645         | 1370         | 1170         | 1434          |
| Nb          | 10014        | 10131        | 14257        | 13045        | 7497         | 7968         | 6546         | 8961         | 7327         | 8766          |
| Mo          | 0.26         | 0.37         | 0.37         | 0.34         | 0.46         | 0.50         | 0.61         | 0.14         | 11.76        | 5.05          |
| Sn          | 586          | 37.40        | 56.57        | 49.07        | 1616         | 2488         | 2675         | 453          | 1962         | 2264          |
| Cs          | 9555         | 6238         | 6359         | 6633         | 4217         | 4774         | 4762         | 5767         | 10261        | 12415         |
| Ba          | 164          | 265          | 187          | 232          | 271          | 211          | 391          | 409          | 77.62        | 91.54         |
| La          | 284          | 65.54        | 45.18        | 23.85        | 17.41        | 275          | 140          | 30.23        | 40189        | 7364          |
| Ce          | 755          | 372          | 261          | 171          | 112          | 677          | 667          | 198          | 55798        | 8820          |
| Pr          | 73.35        | 49.51        | 34.60        | 26.68        | 22.18        | 94.22        | 111          | 36.32        | 4157         | 1554          |
| Nd          | 217          | 174          | 121          | 105          | 132          | 445          | 580          | 179          | 11612        | 6307          |
| Sm          | 24.71        | 21.35        | 14.83        | 12.92        | 51.06        | 75.53        | 130          | 56.10        | 1061         | 1364          |
| Eu          | 0.36         | 0.36         | 0.20         | 0.12         | 1.19         | 1.88         | 2.44         | 0.32         | 32.15        | 64.19         |
| Gd          | 9.89         | 8.20         | 5.42         | 4.89         | 36.28        | 28.37        | 59.88        | 34.79        | 620          | 1380          |
| Tb          | 1.21         | 0.91         | 0.59         | 0.54         | 4.55         | 3.52         | 8.60         | 5.57         | 66.31        | 251           |
| Dy          | 4.10         | 3.48         | 2.41         | 2.25         | 12.62        | 12.14        | 33.19        | 23.76        | 345          | 1672          |
| Ho          | 0.62         | 0.44         | 0.37         | 0.32         | 1.17         | 1.15         | 3.19         | 3.21         | 66.64        | 370           |
| Er          | 0.78         | 1.00         | 0.64         | 0.46         | 0.93         | 1.45         | 3.42         | 5.67         | 197          | 1084          |
| Tm          | 0.04         | 0.11         | 0.08         | 0.04         | 0.06         | 0.10         | 0.20         | 0.67         | 30.08        | 173           |
| Yb          | 0.28         | 0.62         | 0.52         | 0.29         | 0.12         | 0.27         | 0.62         | 2.98         | 168          | 1110          |
| Lu          | 0.04         | 0.11         | 0.05         | 0.03         | 0.03         | 0.03         | 0.05         | 0.40         | 14.81        | 108           |
| Hf          | 70.06        | 41.23        | 64.21        | 51.33        | 195          | 203          | 287          | 51.14        | 86.93        | 115           |
| Ta          | 73.06        | 46.24        | 727          | 760          | 19.92        | 192          | 93.65        | 61.53        | 105          | 188           |
| W           | 0.32         | 1.32         | 1.13         | 1.99         | 0.25         | 0.21         | 0.60         | 0.94         | 0.91         | 1.50          |
| Pb          | 992          | 2991         | 1452         | 1460         | 3884         | 3435         | 2261         | 6433         | 13350        | 13194         |
| Th          | 28.47        | 53.17        | 66.10        | 39.02        | 5.39         | 18.84        | 10.97        | 38.04        | 2214         | 2068          |
| U           | 51.17        | 16.69        | 453          | 168          | 1.74         | 1.55         | 0.68         | 7.90         | 34.49        | 40.64         |
